# Supplementary material for: [Retracted] Glucosamine Supplementation in Premating Drinking Water Improves Within‐Litter Birth Weight Uniformity of Rats Partly through Modulating Hormone Metabolism and Genes Involved in Implantation
Source: Hindawi journal article supplement (doi:10.1155/2020/1630890), 2020-01-01
Supplement: f1 [file 1630890.f1.docx]

**Online Supporting Material**

**Table S1. Diet composition of basal and reproductive diets**

| Items/kg diet | Basal diet | Reproductive diet |
| --- | --- | --- |
| Vitamin A | 7000 IU | 14000 IU |
| Vitamin D | 800 IU | 1500 IU |
| Vitamin E | 60I U | 120 IU |
| Vitamin K | 3 mg | 5 mg |
| Vitamin B1 | 8 mg | 13 mg |
| Vitamin B2 | 10 mg | 12 mg |
| Vitamin B6 | 6 mg | 12 mg |
| Vitamin B12 | 0.022 mg | 0.022 mg |
| Biotin | 0.1 mg | 0.2 mg |
| Niacin | 0.1 mg | 60 mg |
| Pantothenic acid | 45 mg | 24 mg |
| Folacin | 17 mg | 6 mg |
| Choline | 4 mg | 1250 mg |
| Na | 1250 mg | 2 g |
| K | 2 g | 5 g |
| Mg | 5 g | 2 g |
| Cu | 2 g | 10 mg |
| Fe | 10 mg | 120 mg |
| Zn | 100 mg | 30 mg |
| Mn | 30 mg | 75 mg |
| I | 75 mg | 0.5 mg |
| Se | 0.5 mg | 0.15 mg |
| Ca | 0.15 g | 14 g |
| P | 14 g | 9 g |
| Moisture | 100 g | 100 g |
| Crude ash | 80 g | 80 g |
| Crude protein,% | 180 g | 200 g |
| Crude fat | 40 g | 40 g |
| Crude fibre | 50 g | 50 g |
| Lys | 8.2 g | 13.2 g |
| Met+Cys-Cys | 5.3 g | 7.8 g |
| Arg | 9.9 g | 11 g |
| Trp | 1.9 g | 2.5 g |
| His | 5.5 g | 5.5 g |
| Phe+Tyr | 11.0 g | 13.0 g |
| Thr | 6.5 g | 8.8 g |
| Leu | 14.4 g | 17.6 g |
| Ile | 7.0 g | 10.3 g |
| Val | 8.4 g | 11.7 g |

| **Table S2: Effects of GlcN administration in premating drinking water on reproductive performances of the primlparous rats** | | | | | |
| --- | --- | --- | --- | --- | --- |
| **Items** | **Control** | **0.5 mM GlcN** | **1.0 mM GlcN** | **SEM1** | ***P* value** |
| CV, % | 8.17a | 5.55b | 5.77b | 0.40 | < 0.01 |
| Average body weight of live-born rats, g | 2.02a | 2.27b | 2.31b | 0.03 | < 0.01 |
| Placental efficiency2 | 3.25a | 3.68b | 3.49a | 0.06 | 0.02 |
| Litter size of live-born rats, n | 11.73 | 13.45 | 12.00 | 0.50 | 0.32 |

1 SEM, Standard error of the mean, *n*=11

2 Placental efficiency = Fetal weight/ corresponding placental weight

a, b Different letter means significantly different (*P* < 0.05)

**Table S3. List of primer sequences.**

| Gene | Forward (5’-3’) | Reverse (5’-3’) |
| --- | --- | --- |
| β-Actin (1) | TCCACCCGCGAGTACAACCTTCTT | CGACGAGCGCAGCGATATCGT |
| ALK3 | GTATGCTCCATGGCACTGGT | AGCATCATCTGGGCAGTGTC |
| BMP2 | GGGACCCGCTGTCTTCTAGT | TCAACTCAAATTCGCTGAGGAC |
| IGF-1 (2) | GCTGGTGGATGCTCTTCAGTT | TCCGAATGCTGGAGCCATA |
| Mucin1 (2) | CCATCCTATGAGTGAATACCCTACCT | AAGAGAGACTGCTACTGCCATTACC |
| iNOS (3) | GTGCTAATGCGGAAGGTCATG | GCTTCCGACTTTCCTGTCTCAGTA |

Supplemental Literatures Cited:

1. Silva JF, Ocarino NM, Serakides R. Luteal activity of pregnant rats with hypo-and hyperthyroidism. J Ovarian Res. 2014 Jul 12;7:75.
2. Lee DS, Yanagimoto Ueta Y, Xuan X, Igarashi I, Fujisaki K, Sugimoto C, Toyoda Y, Suzuki H. Expression patterns of the implantation-associated genes in the uterus during the estrous cycle in mice. J Reprod Dev. 2005;51:787-98.
3. Hongxia Shen, Xiaoming Hu, Can Liu, Suping Wang, Wenting Zhang, Hui Gao, R. Anne Stetler, Yanqin Gao, and Jun Chen. Ethyl pyruvate protects against hypoxic-ischemic brain injury via anti-cell death and anti-inflammatory mechanisms. Neurobiol Dis. 2010; 37: 711–722.

**Table S4. Growth performance during GlcN treatment periods**

| **Items** | **Control** | **GlcN** | ***P* value** |
| --- | --- | --- | --- |
| **d1-5** |  |  |  |
| ADG (g/d) | 3.18±0.12 | 3.08±0.22 | 0.72 |
| ADFI (g/d) | 13.38±0.20 | 13.70±0.37 | 0.45 |
| **d6-10** |  |  |  |
| ADG (g/d) | 4.16±0.31 | 3.68±0.41 | 0.36 |
| ADFI (g/d) | 17.86±0.21 | 17.60±0.58 | 0.69 |
| **d11-14** |  |  |  |
| ADG (g/d) | 3.33±0.18 | 3.30±0.32 | 0.93 |
| ADFI (g/d) | 18.69±0.26 | 18.30±0.64 | 0.59 |
| **d1-14** |  |  |  |
| ADWI (ml) | 41.74±2.60 | 39.59±2.04 | 0.47 |

*n*=10 dams per group. All data was represented as mean ± SEM.
